# Supplementary material
Source: publisher figshare collection journal article supplement (https://gsajournals.figshare.com/articles/dataset/_/16746298)
Supplement: Supplementary file 1 [file 1]

# Supplementary Figure 1

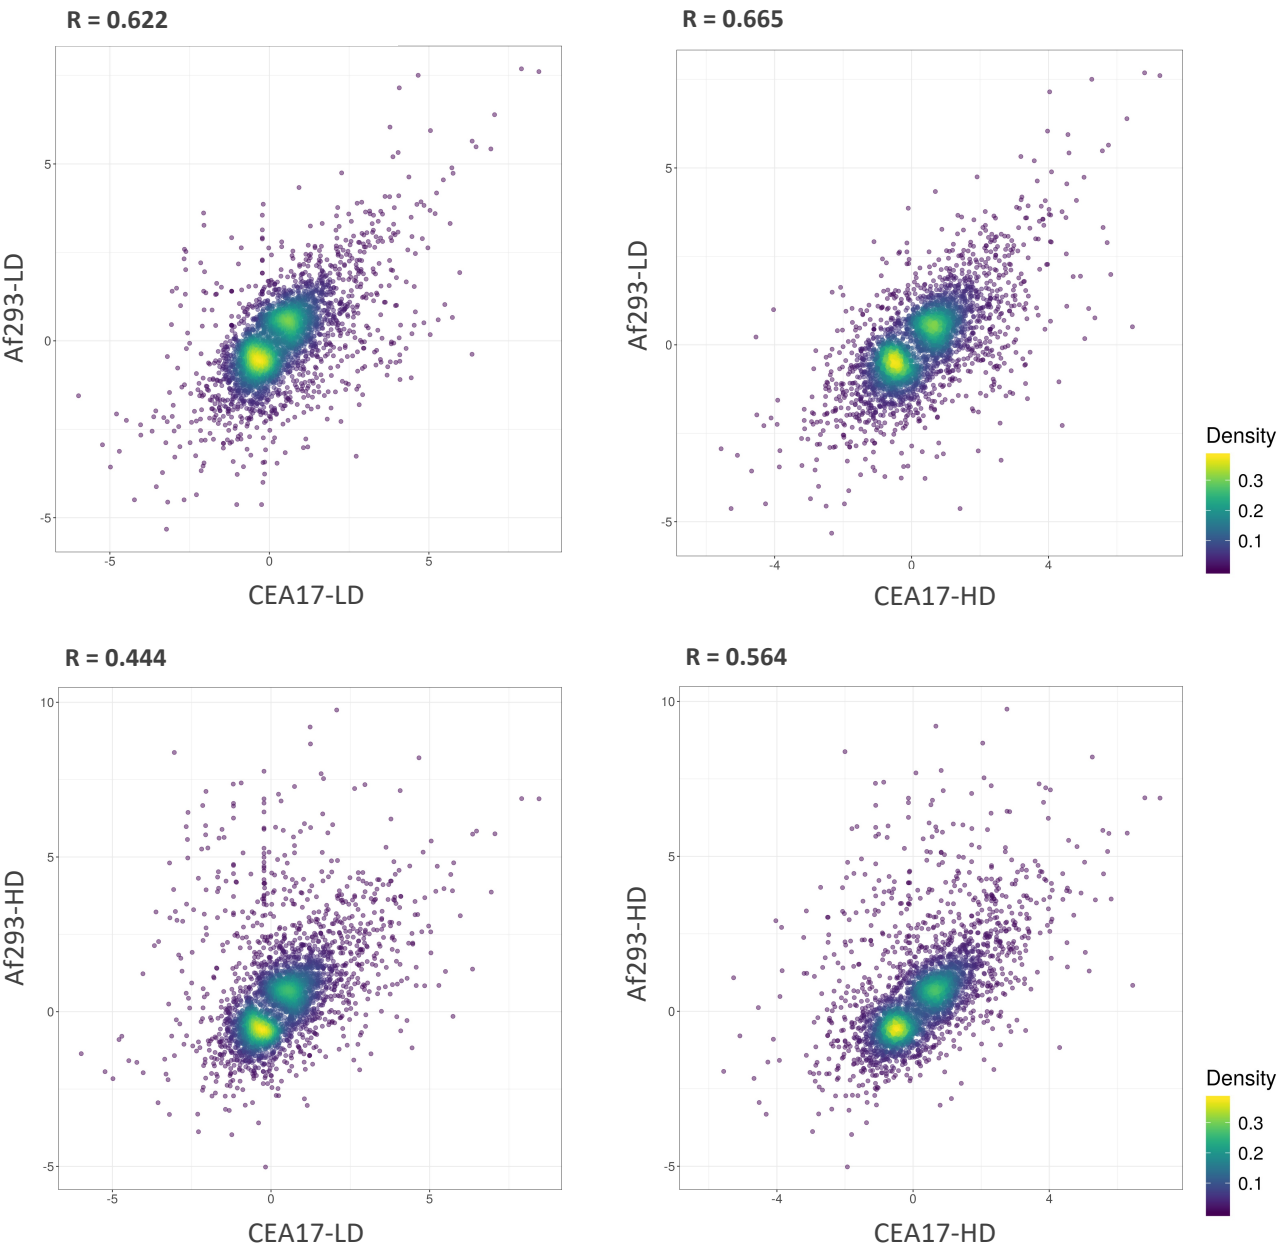

**Supplementary Figure 1:** Scatter plots representing the correlation between the relative expression of the transcriptome pairs.

Supplementary Figure 2

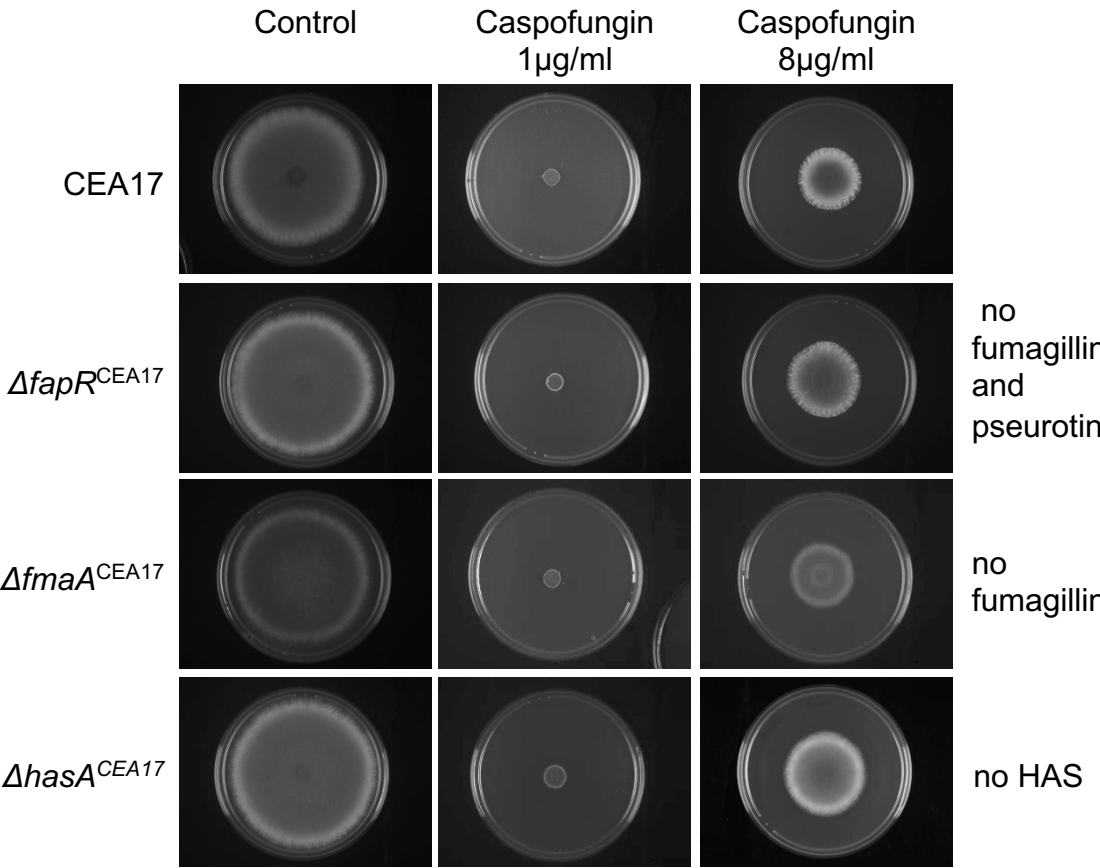

**Supplementary Figure 2:** Radial growth in solid media of Wt,  $\Delta fapR$ ,  $\Delta fmaA$  and  $\Delta hasA$  muntants exposed to 1 and 8 µg/ml of CSP.

Supplementary Figure 3

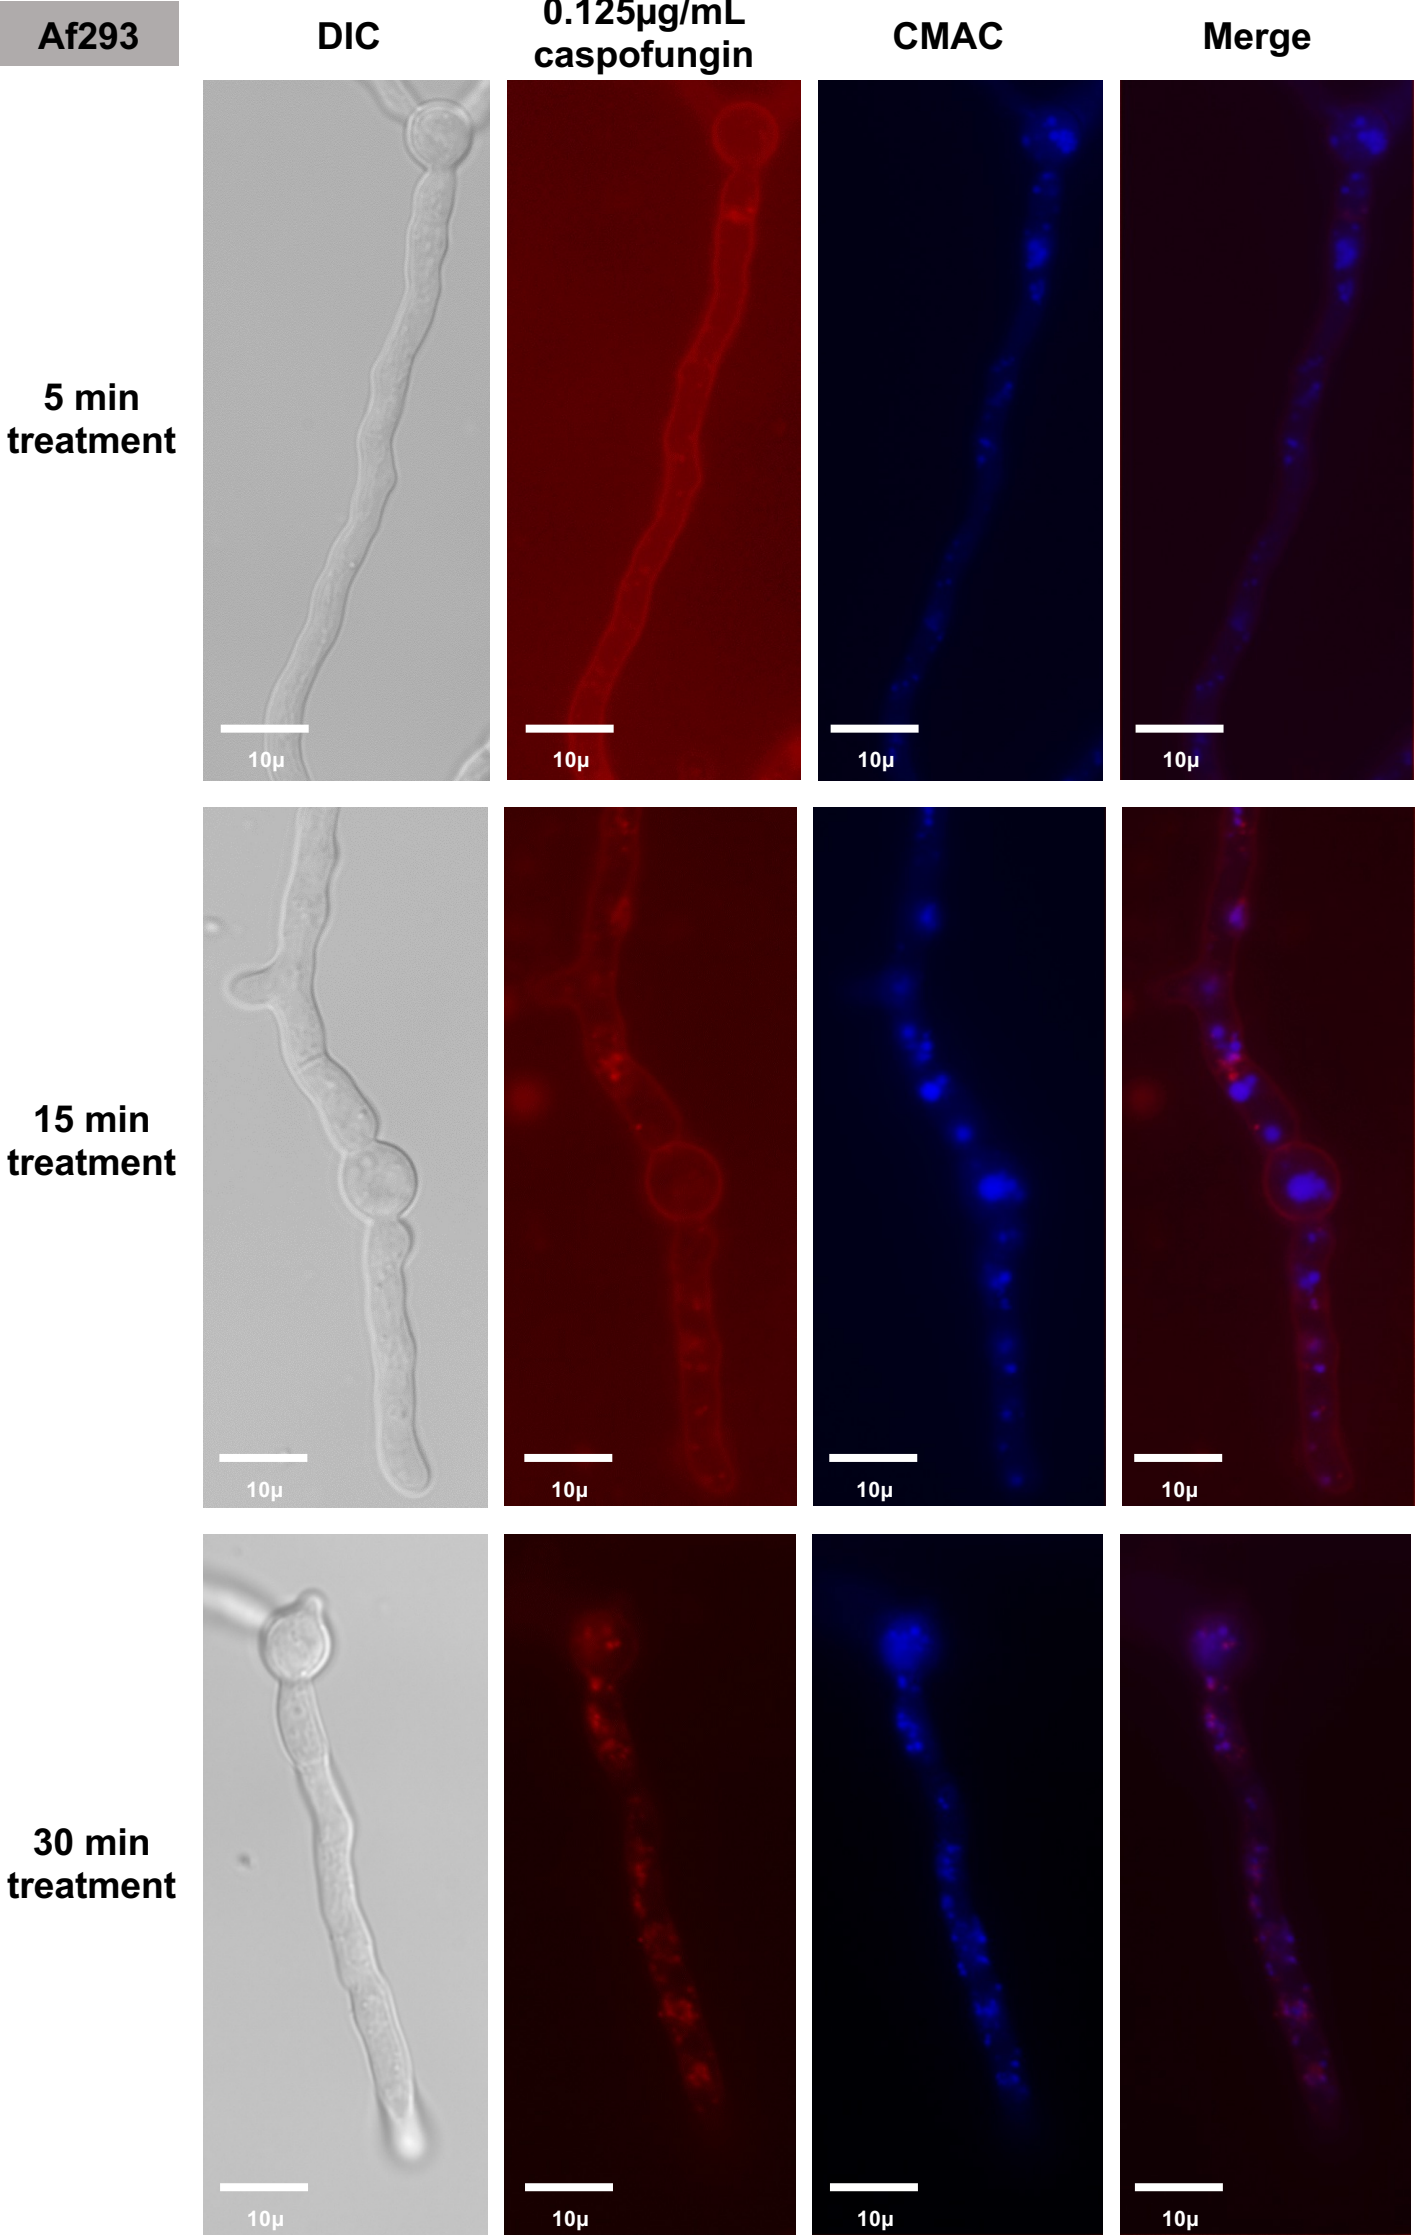

Supplementary Figure 3

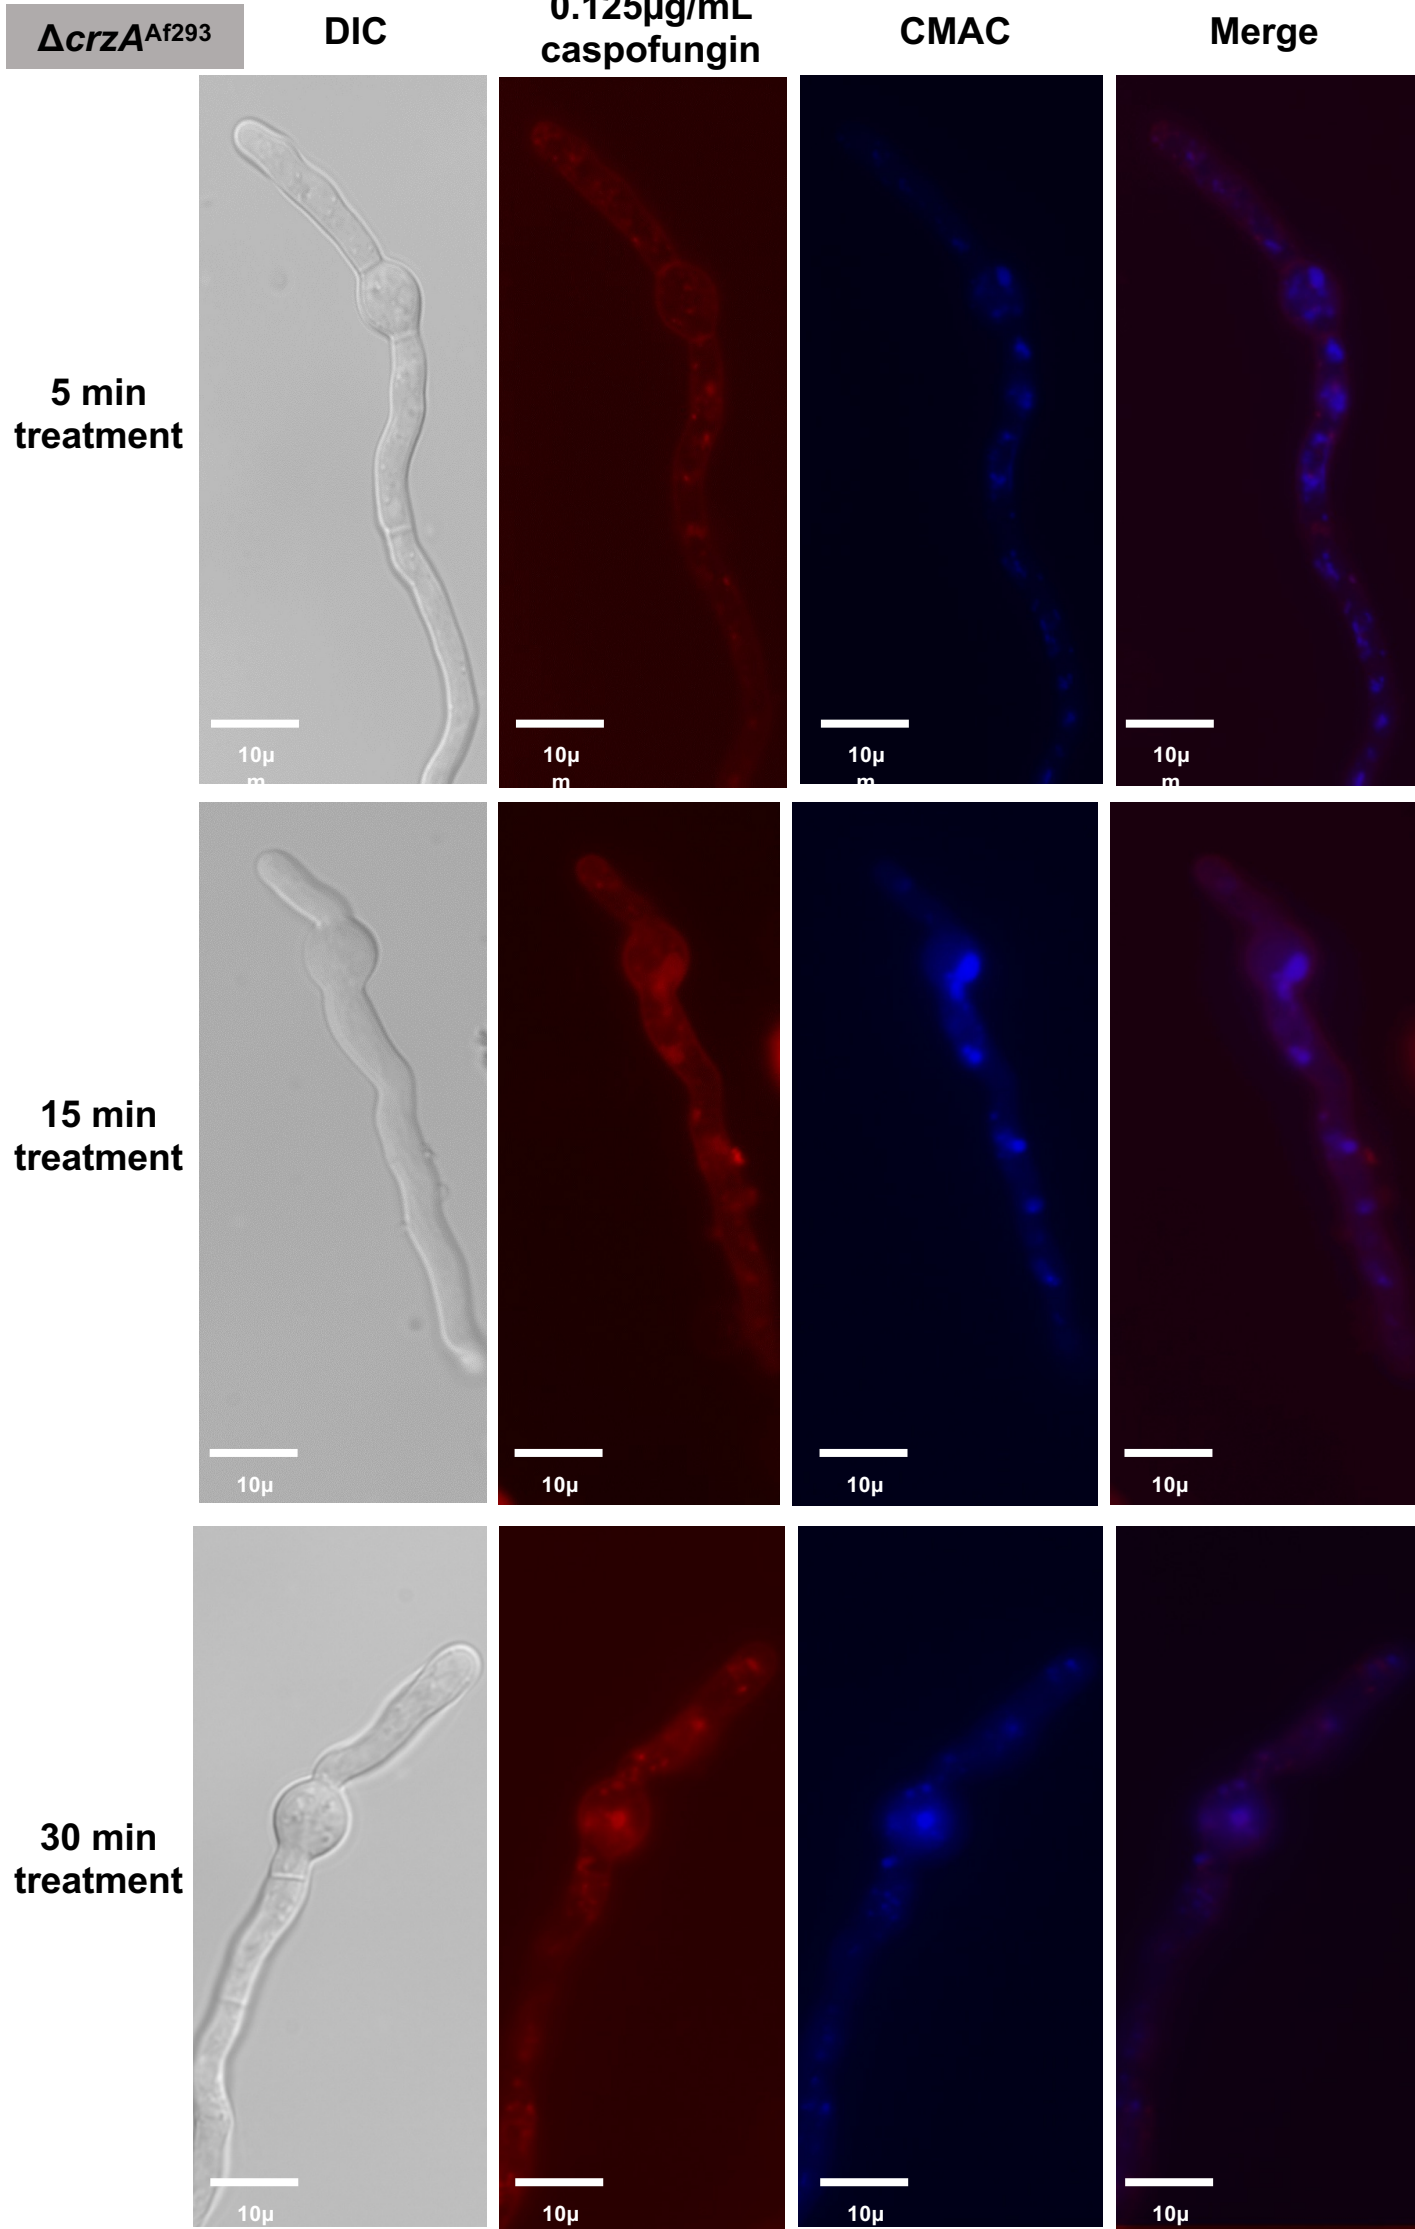

Supplementary Figure 3

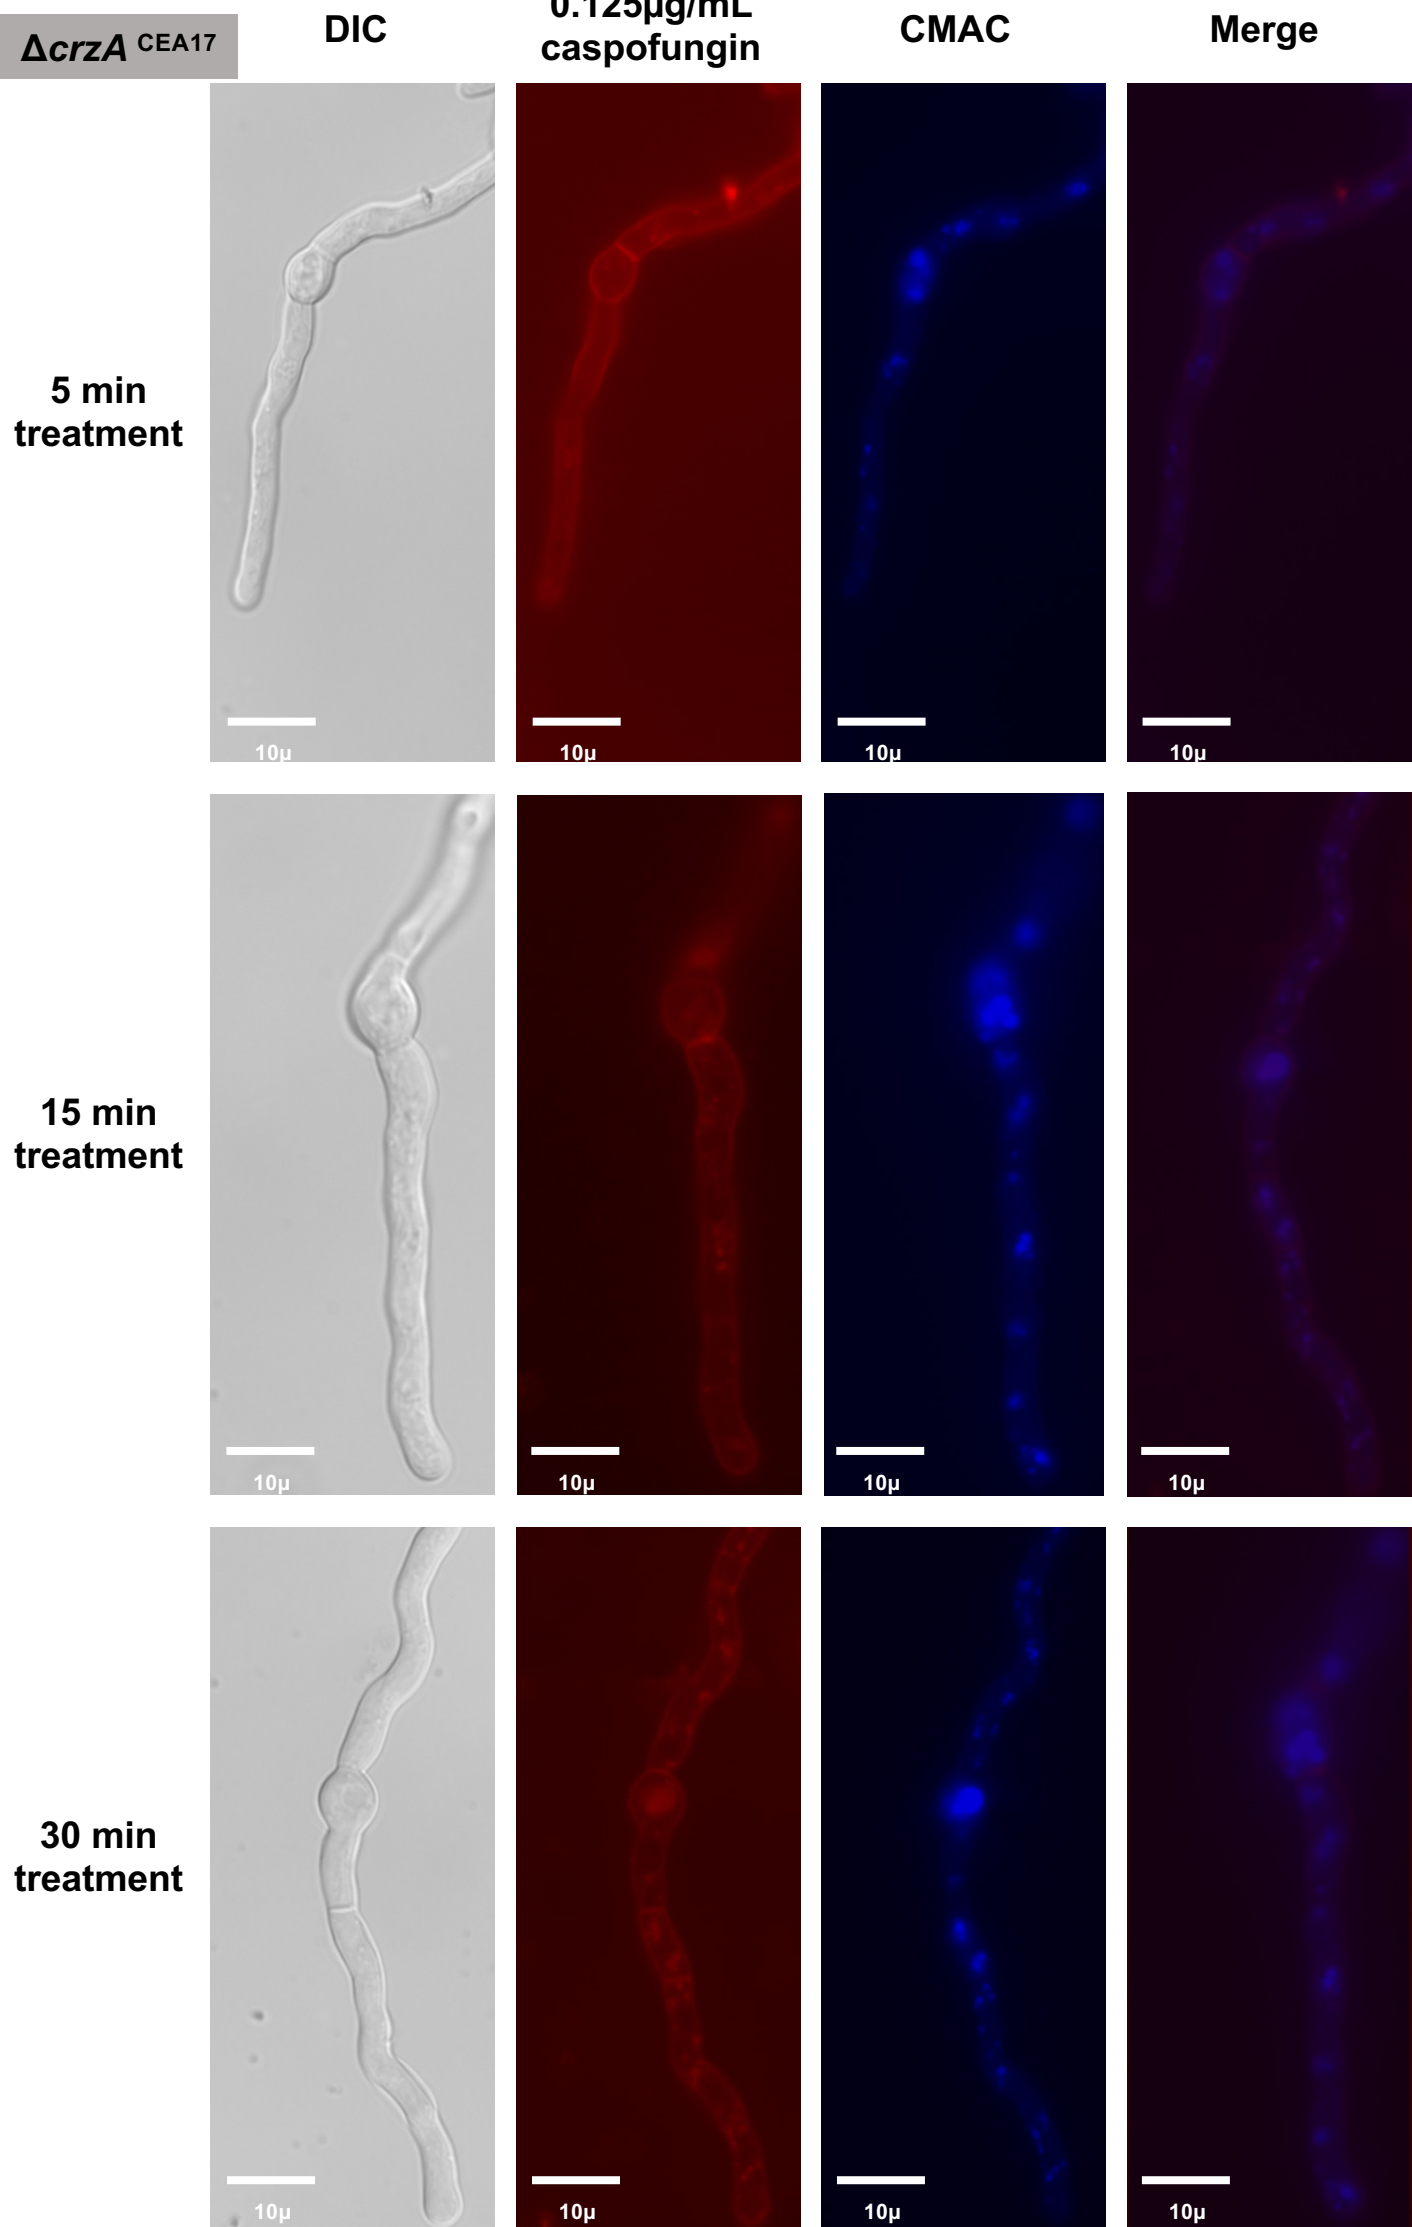

**Supplementary Figure 3:** Cellular localization determined by microscopy of FCSP in the Af293,  $\Delta crzA$ <sup>Af293</sup> and  $\Delta crzA$ <sup>CEA17</sup> strains after 5, 10 and 15 minutes of exposure to 0.125  $\mu$ g/ml, the vacuoles were labeled with blue CMAC dye.



Supplementary Figure 4

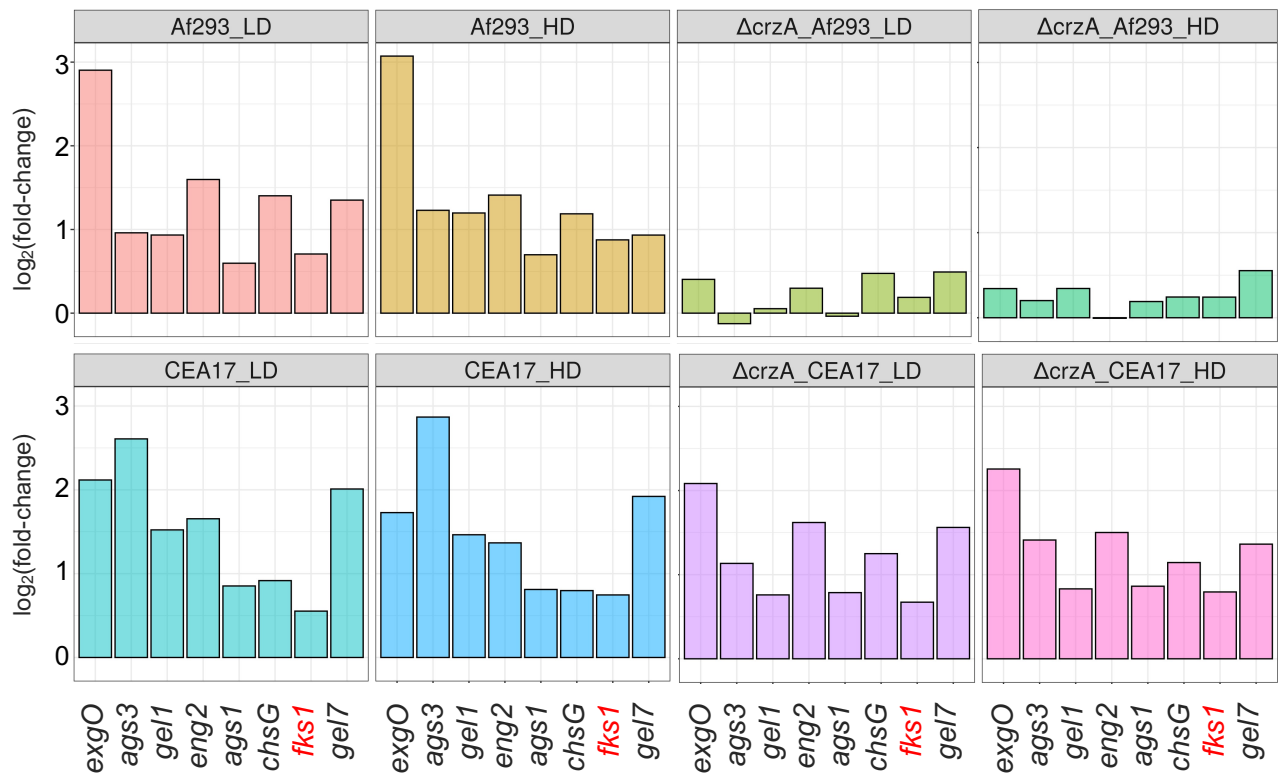

**Supplementary Figure 4:** Relative expression of genes involved in cell-wall metabolism in Af293, CEA17,  $\Delta$ crzA<sup>Af293</sup> and  $\Delta$ crzA<sup>CEA17</sup> exposed to LD and HD of CSP.

# Supplementary Figure 5

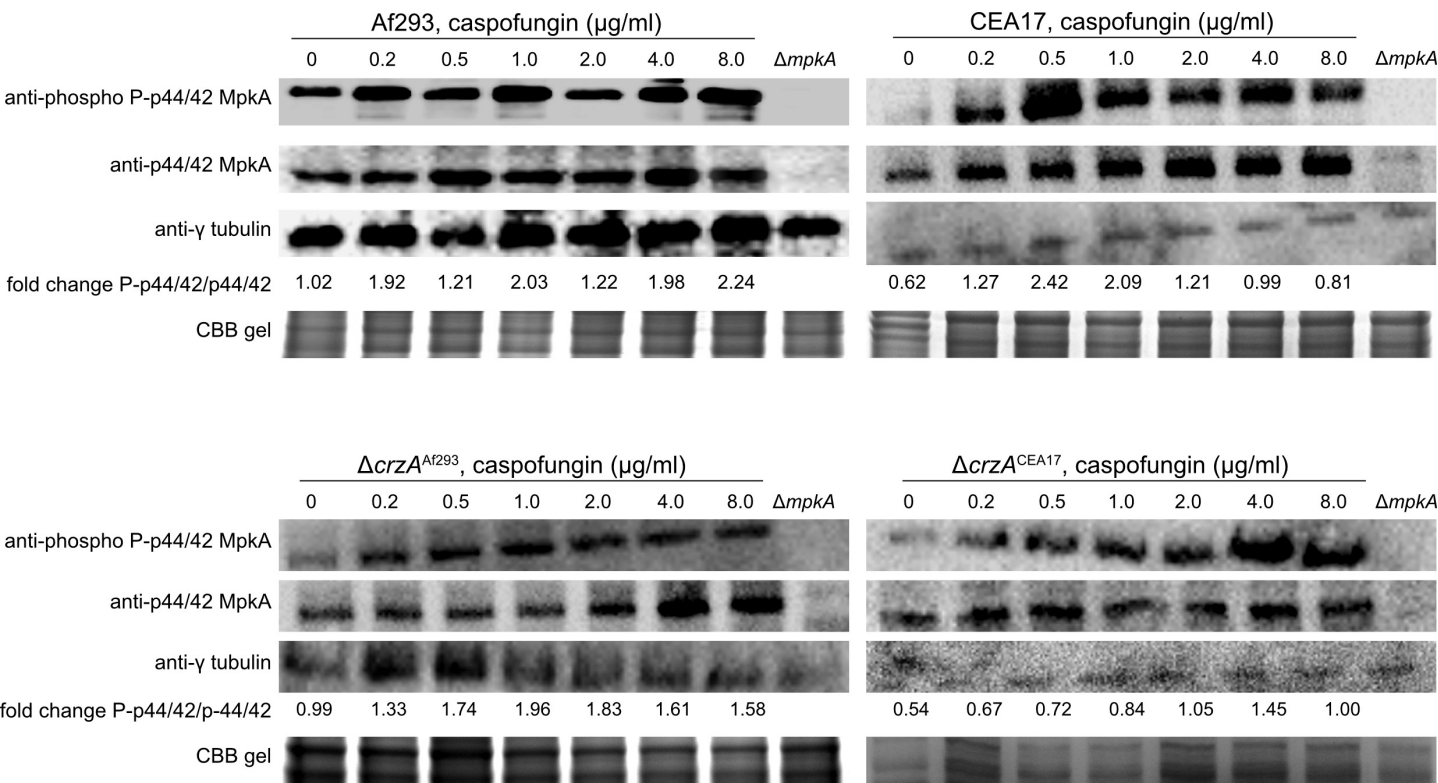

**Supplementary Figure 5:** Immunoblot assay of MpkA phosphorylation exposed to increasing CSP concentrations using anti-p44/42 MpkA or anti-44/42 MpkA antibodies to detect the phosphorylated and total MpkA, respectively. The anti-γ-tubulin antibody and a Coomassie brilliant blue (CBB) gel were used as loading controls and the signal intensities were quantified using the ImageJ software.
